# Supplementary material
Source: ML conference proceedings conference paper supplement (https://proceedings.neurips.cc/paper_files/paper/2009/hash/e4bb4c5173c2ce17fd8fcd40041c068f-Abstract.html)
Supplement: Supplementary file 1 [file e4bb4c5173c2ce17fd8fcd40041c068f-Supplemental.zip]

Archive with 1 entries (1 files):
- extra/NIPS2009_0695_extra.pdf
